# Supplementary material for: Nonsense mutation-dependent reinitiation of translation in mammalian cells
Source: PubMed Central journal article supplement — Nucleic Acids Res. 2019 May 2;47(12):6330–8. doi: 10.1093/nar/gkz319 (PMC6614817; doi:10.1093/nar/gkz319), 2019-05-02
Supplement: gkz319_supplemental_file.pdf [file gkz319_supplemental_file.pdf]

# Supplementary Data

## Nonsense mutation-dependent reinitiation of translation in mammalian cells

Sarit Cohen<sup>1</sup>, Lior Kramarski<sup>2</sup>, Shahar Levi<sup>1</sup>, Noa Deshe<sup>\*1</sup>, Oshrit Ben-David<sup>1</sup>, and Eyal  
Arbely<sup>†1,2</sup>

<sup>1</sup>Department of Chemistry and National Institute for Biotechnology in the Negev, Ben Gurion University of the  
Negev, Beer-Sheva, 8410501, Israel

<sup>2</sup>Department of Life Sciences, Ben Gurion University of the Negev, Beer-Sheva, 8410501, Israel

---

\*Current address: Department of Genetics, Silberman Institute of Life Sciences, Edmond J. Safra Campus, The Hebrew University, Jerusalem, Israel

†Corresponding Author: [arbely@bgu.ac.il](mailto:arbely@bgu.ac.il)

## Supplementary Tables

| Primer number | name                     | Sequence                                                  |
|---------------|--------------------------|-----------------------------------------------------------|
| Pr 1          | p53 EF1 $\alpha$ _FW     | GACTAGCGGCCGCATGCATCATCACCATCACCATGA<br>GGAGCCGCAGTCAGATC |
| Pr 2          | HA tag EF1 $\alpha$ _Rev | CACTAGGTACCttaAGCGTAATCTGGAACATCGTATGGGTAC                |
| Pr 3          | p53 CMV_FW               | GACTAGGATCCATGCATCATCACCATCACCATGAGGAG<br>CCGCAGTCAGATC   |
| Pr 4          | HA tag CMV_Rev           | CACTAGAATTttaAGCGTAATCTGGAACATCGTATGGGTAC                 |
| Pr 5          | Q38TAG_FW                | GTCCCCCTTGCCGTCCtagGCAATGGATGATTTG                        |
| Pr 6          | Q38TAG_Rev               | ATCATCCATTGCctaGGACGGCAAGGGGGACAG                         |
| Pr 7          | Q52TAG_FW                | CGGACGATATTGAAtagTGGTTCACTGAAGACCCAG                      |
| Pr 8          | Q52TAG_Rev               | GTCTTCAGTGAACCActaTTCAATATCGTCCGGGGAC                     |
| Pr 9          | K120TAG_FW               | GGGACAGCCTAGTCTGTGACTTGC                                  |
| Pr 10         | K120TAG_Rev              | GCAAGTCACAGACTAGGCTGTCCC                                  |
| Pr 11         | K164TAG_FW               | CATGGCCATCTACtagCAGTCACAGCACATGAC                         |
| Pr 12         | K164TAG_Rev              | ATGTGCTGTGACTGctaGTAGATGGCCATGG                           |
| Pr 13         | Q52TGA_FW                | GGACGATATTGAAtgaTGGTTCACTG                                |
| Pr 14         | Q52TGA_Rev               | GGTCTTCAGTGAACCAAtcaTTCAATATC                             |
| Pr 15         | Q52TAA_FW                | GGACGATATTGAAAtAaTGGTTCACTG                               |
| Pr 16         | Q52TAA_Rev               | GGTCTTCAGTGAACCAAtTaTTCAATATC                             |
| Pr 17         | Q38TGA_FW                | CCCCCTTGCCGTCCtGAGCAATG                                   |
| Pr 18         | Q38TGA_Rev               | CAAATCATCCATTGCTCaGGACGGCAAG                              |
| Pr 19         | Q38TAA_FW                | CCCCCTTGCCGTCCtAAGCAATGGATG                               |
| Pr 20         | Q38TAA_Rev               | CAAATCATCCATTGCTTaGGACGGCAAG                              |
| Pr 21         | R273H_FW                 | AGCTTTGAGGTGCATGTTTGTGC                                   |
| Pr 22         | R273H_Rev                | GACAGGCACAAACATGCACCTC                                    |
| Pr 23         | M133L_FW                 | CTGCCCTCAACAAGctaTTTTGCCAACTGGCCAAG                       |
| Pr 24         | M133L_Rev                | TGGCCAGTTGGCAAAAAtagCTTGTTGAGGGCAG                        |
| Pr 25         | M40L_FW                  | GTCCCAAGCAAtTGGATGATTTGATGCTG                             |
| Pr 26         | M40L_Rev                 | CATCAAATCATCCAaTGCTTGGGACGGCAAG                           |
| Pr 27         | M40L M44L_FW             | GTCCCAAGCAAtTGGATGATTTGtTGCTGTC                           |
| Pr 28         | M40L M44L_Rev            | GTCCGGGGACAGCAaCAAATCATCCAaTGCTTG                         |
| Pr 29         | Q38TAG frameshift_FW     | CCTTGCCGTCCtagGGCAATGGATGATTTGATGCTG                      |
| Pr 30         | Q38TAG frameshift_Rev    | CATCAAATCATCCATTGCCctaGGACGGCAAGGGGGAC                    |

|       |                        |                                                    |
|-------|------------------------|----------------------------------------------------|
| Pr 31 | Q52TAG frameshift_FW   | GAAtagTGGTTCgACTGAAGACCCAGGTC                      |
| Pr 32 | Q52TAG frameshift_Rev  | GACCTGGGTCTTCAGTcGAACCActaTTCAATATC                |
| Pr 33 | K120TAG frameshift_FW  | CAGCCtagTCTGTGgACTTGCACGTACTC                      |
| Pr 34 | K120TAG frameshift_Rev | GTACGTGCAAGTcCACAGActaGGCTGTC                      |
| Pr 35 | M66L _FW               | GAAGCTCCCAGActaCCAGAGGCTGCTC                       |
| Pr 36 | M66L _Rev              | GCAGCCTCTGGtagTCTGGGAGCTTCATC                      |
| Pr 37 | Enolase_FW             | GACTAGCGGCCGCATGTCTATTCTCAAGATCCATG<br>CCAGGGAGATC |
| Pr 38 | Enolase_Rev            | GAACATCGTATGGGTACATCTTGGCCAAGGGGTTTCTG             |
| Pr 39 | Enolase K80TAG_FW      | ctgccctggtagctAGAAACTGAACGTCACAG                   |
| Pr 40 | Enolase K80TAG_Rev     | GTGACGTTTCAGTTTCTagctaaccagggcagG                  |
| Pr 41 | Enolase G156TAG_FW     | CAATGTCATCAATGGCtagTCTCATGCTGGCAACAAG              |
| Pr 42 | Enolase G156TAG_Rev    | GTTGCCAGCATGAGActaGCCATTGATGACATTGAAC              |
| Pr 43 | PFK WT _FW             | ataagaatGCGGCCGCATGGACGCGGACG                      |
| Pr 44 | PFK WT _Rev            | GAACATCGTATGGGTACATGACACTCCAGGGCTGCACATG           |
| Pr 45 | PFK K25TAG _FW         | CCGGGGCCGGCtagGCCATCGGCGTGCTGAC                    |
| Pr 46 | PFK K25TAG _Rev        | CACGCCGATGGCctaGCCGGCCCCGGAGAGGTG                  |
| Pr 47 | p53 M1 bac_FW          | GACTAcatATGGAGGAGCCGCAGTCAGATC                     |
| Pr 48 | p53 M40 bac_FW         | GACTAcatATGGATGATTTGATGCTGTCCCCGGAC                |
| Pr 49 | p53 M66 bac_FW         | GACTAcatATGCCAGAGGCTGCTCCCCCGTG                    |
| Pr 50 | p53 M133 bac_FW        | GACTAcatATGTTTTGCCAACTGGCCAAGACCTGC                |
| Pr 51 | p53 M160 bac_FW        | GACTAcatATGGCCATCTACAAGCAGTCACAGCAC                |
| Pr 52 | p53 M169 bac_FW        | GACTAcatATGACGGAGGTTGTGAGGCGCTGCC                  |
| Pr 53 | p53 bac_Rev            | CACTACTCGAGttaAGCGTAATCTGGAACATCGTATGGGTAC         |

**Table S1.** Sequences of primers used in cloning steps.

| Primer number | name                       | Sequence                |
|---------------|----------------------------|-------------------------|
| Pr 1          | GAPDH_FW                   | agccacatcgctcagacac     |
| Pr 2          | GAPDH_Rev                  | aatacgaccaaatccgttgact  |
| Pr 3          | p53 N terminus (p-5'1)_FW  | gtccaagcaatggatgatt     |
| Pr 4          | p53 N terminus (p-5'1)_Rev | tctggacctgggtcttcagt    |
| Pr 5          | p53 N terminus (p-5'2)_FW  | aacaacgttctgtcccccttg   |
| Pr 6          | p53 N terminus (p-5'2)_Rev | tctggacctgggtcttcagt    |
| Pr 7          | p53 C terminus_FW          | aggccttgaactcaaggat     |
| Pr 8          | p53 C terminus_Rev         | cccttttggacttcaggtg     |
| Pr 9          | p53 HA _FW                 | cactccagccacctgaag      |
| Pr 10         | p53 HA _Rev                | ctggaacatcgatgggtac     |
| Pr 11         | SC35 1.7_FW                | gtgggcgtgtattggagcaga   |
| Pr 12         | SC35 1.7_Rev               | ctgctacacaactgcgcc      |
| Pr 13         | CARS_FW                    | tgtgaatgttctccctccaga   |
| Pr 14         | CARS_Rev                   | ggcacatactcactaaccgg    |
| Pr 15         | SMG1_FW                    | cagagtccacgctgacatacaga |
| Pr 16         | SMG1_Rev                   | cccaacgacttccgaccata    |

**Table S2.** Sequences of primers used in qPCR analyses.

## Supplementary Figures

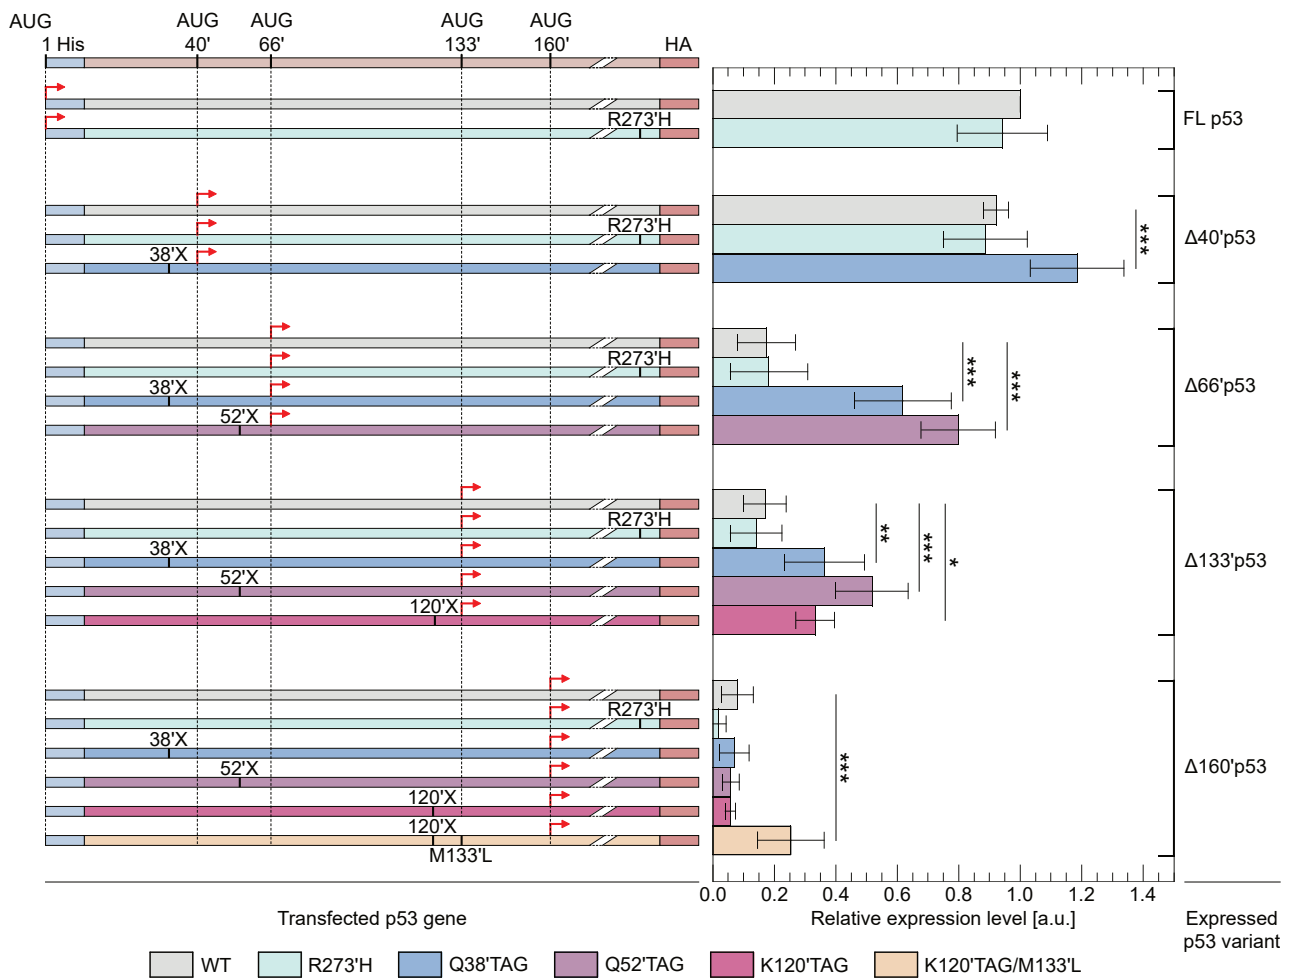

**Figure S1.** Alternative representation of data presented in Figure 1D. HEK293T cells were transfected with plasmids carrying the indicated gene, schematically presented on the left, and according to the color scheme described at the bottom. Red arrows mark possible translation initiation/reinitiation sites. Normalized expression levels displayed in the graph are grouped according to the expressed variant (full-length,  $\Delta 40'$ ,  $\Delta 66'$ ,  $\Delta 133'$ , and  $\Delta 160'$  p53). For example, first two bars from the top, present the expression levels of full-length p53 in cells expressing wild-type p53 (top bar) or R273'H p53 (bottom bar).

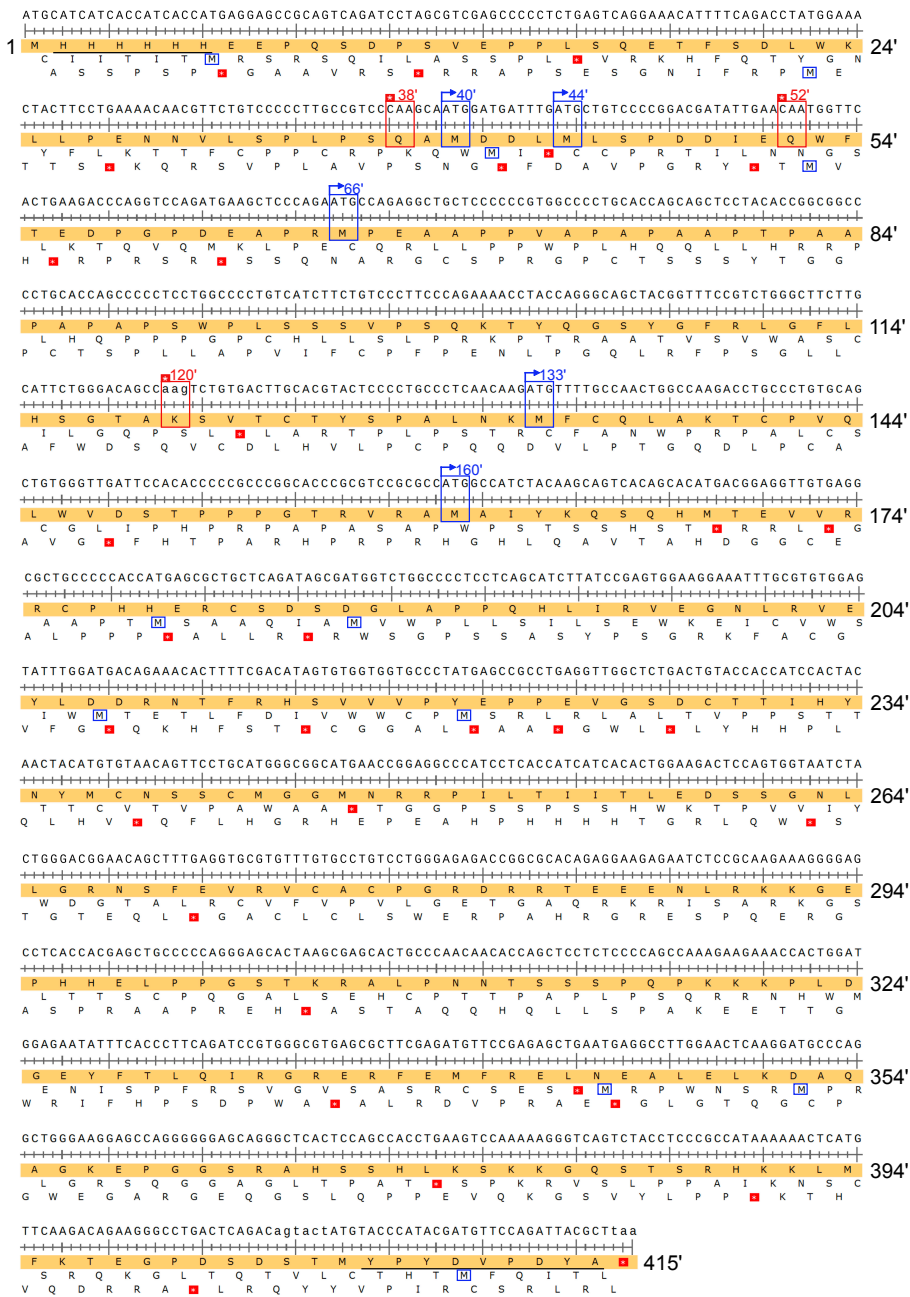

**Figure S2.** In-frame and out-of-frame ATG and stop codons. The cDNA sequence of p53 used in this study is displayed together with its translation in three frames (translation of in-frame codons is highlighted with orange background). Possible initiation sites and termination codons are marked in blue and red, respectively. Introduced stop codon mutations and suggested reinitiation sites, together with codon number-position, are marked with large rectangles. Translation of the two additional reading frames show that out-of-frame stop codons and initiation sites cannot account for the expression of  $\Delta 40'$ ,  $\Delta 66'$ ,  $\Delta 133'$ , and  $\Delta 160'$  p53 seen in Figure 1C.

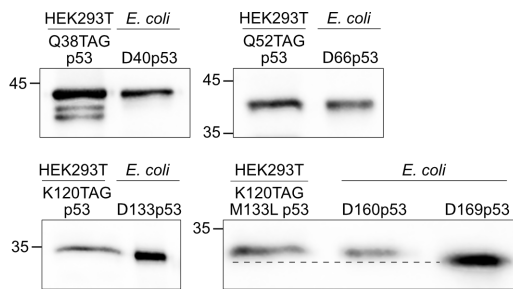

**Figure S3.** Size comparison between p53 variants expressed in cultured mammalian cells and truncated p53 recombinantly expressed in bacteria. The higher molecular weight band of Q38'TAG p53 mutant expressed in HEK293T cells was of the same size as bacterially expressed p53<sub>(40-393)</sub>. Similarly, the higher molecular weight bands of Q52'TAG and K120'TAG p53 expressed in mammalian cells migrated together with bacterially expressed p53<sub>(66-393)</sub> and p53<sub>(133-393)</sub>, respectively. The higher molecular weight band of K120'TAG M133'L p53 mutant expressed in mammalian cells was compared to p53<sub>(160-393)</sub> and p53<sub>(169-393)</sub> expressed in bacteria. Western blotting analysis suggests that the K120'TAG M133'L p53 mutant is expressed as  $\Delta 160$ 'p53 and not as  $\Delta 169$ 'p53.

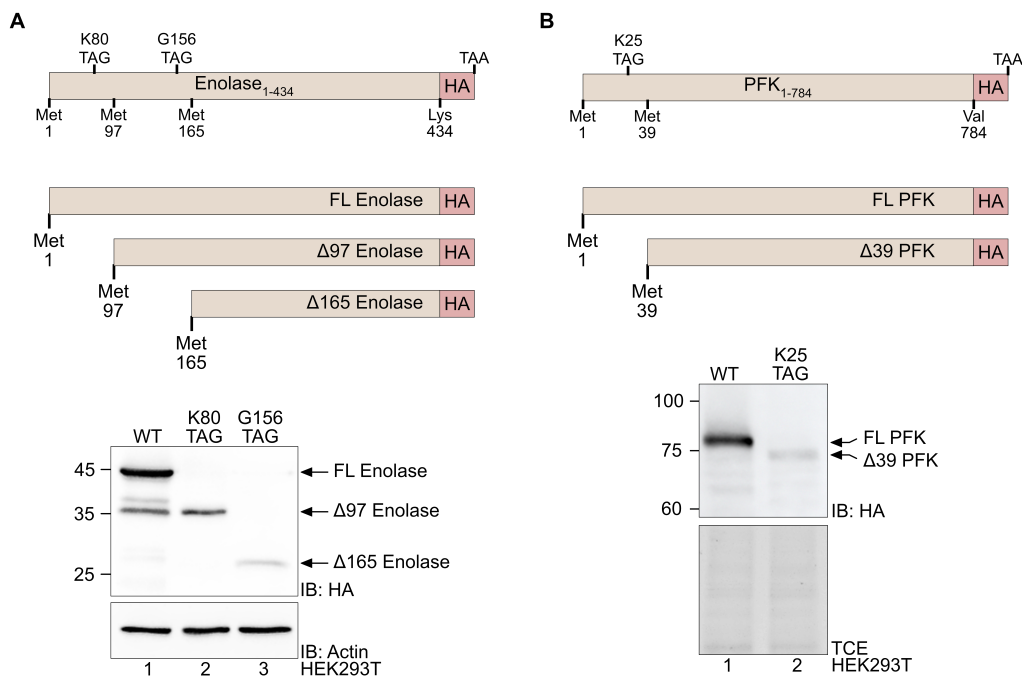

**Figure S4.** In-frame nonsense mutation-dependent expression of N-truncated proteins. **(A)** N-truncated variants of  $\alpha$ -enolase. **Top:** Position of AUG codons (Met) that can serve as initiation or reinitiation sites. To test the effect of a PTC on reinitiation, TAG mutations were introduced at codons corresponding to K80 and G158. **Middle:** Full-length and possible N-truncated variants of  $\alpha$ -enolase, expressed by initiation or reinitiation from the indicated AUG codons. **Bottom:** Western blot of total cell extracts from HEK293T cells expressing WT or TAG mutants of  $\alpha$ -enolase. The codon for Met97 is part of a known internal ribosome entry site. Therefore,  $\Delta$ 97 enolase may be expressed by initiation from the AUG codon at position 97 (Met97). However,  $\Delta$ 165 enolase is expressed by premature termination codon-dependent reinitiation from the AUG codon at position 165. **(B)** N-truncated variants of human platelet-specific isoform of phosphofructokinase (PFK). In-frame nonsense mutation at position Lys25 promoted reinitiation of translation from downstream AUG codon at position 39.



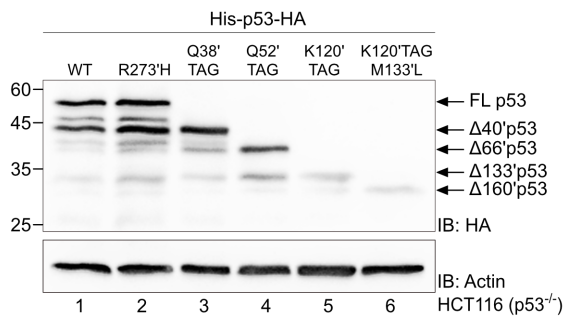

**Figure S5.** Expression of N-truncated variants of p53 in HCT116 (p53<sup>-/-</sup>). Cells were transfected with plasmids carrying the indicated p53 variants and expression of N-truncated p53 was analysed by Western blot using antibodies against the C-terminal HA-tag.

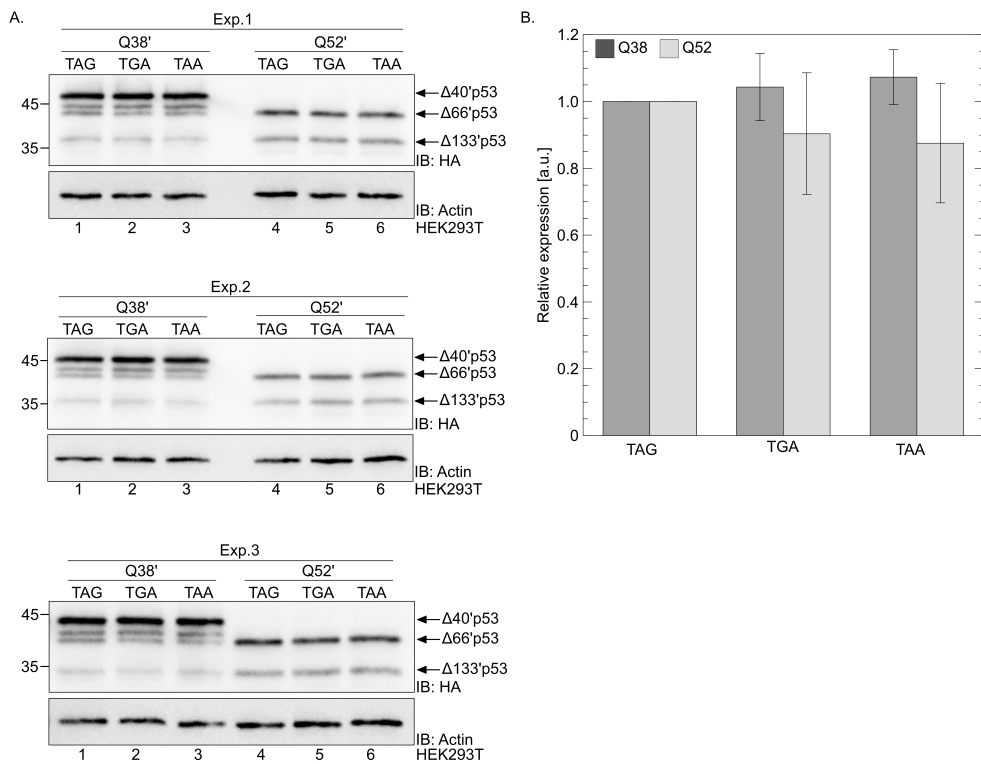

**Figure S6.** (A) Expression of N-truncated p53 as a function of premature stop codon type. Indicated stop codon mutations (TAG, TGA, or TAA) were introduced at codons for positions Q38' or Q52', and expression of N-truncated p53 was evaluated by Western blotting using antibodies against the C-terminal HA-epitope. The experiment was performed in triplicate (Exp. 1, 2, or 3). (B) Quantification of expression levels of  $\Delta 40'$  and  $\Delta 66'$  measured in triplicate as described in panel A. Displayed values are mean  $\pm$  SD.

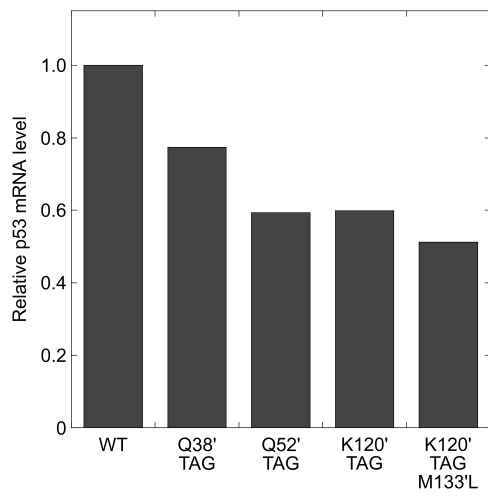

**Figure S7.** Relative mRNA levels of p53 mRNA transcripts with an in frame nonsense mutation. mRNA levels in HCT116 (p53<sup>-/-</sup>) cells expressing indicated constructs were measured by RT-qPCR. Values are displayed relative to mRNA transcript without stop codon (WT).

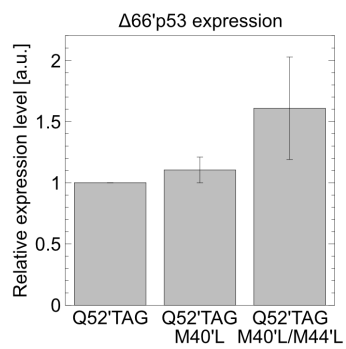

**Figure S8.** Quantification of the Western blot analysis displayed in Figure 3 panel A, lanes 4–6. Data are presented relative to expression levels of Q52'TAG ( $n=3 \pm SD$ ).

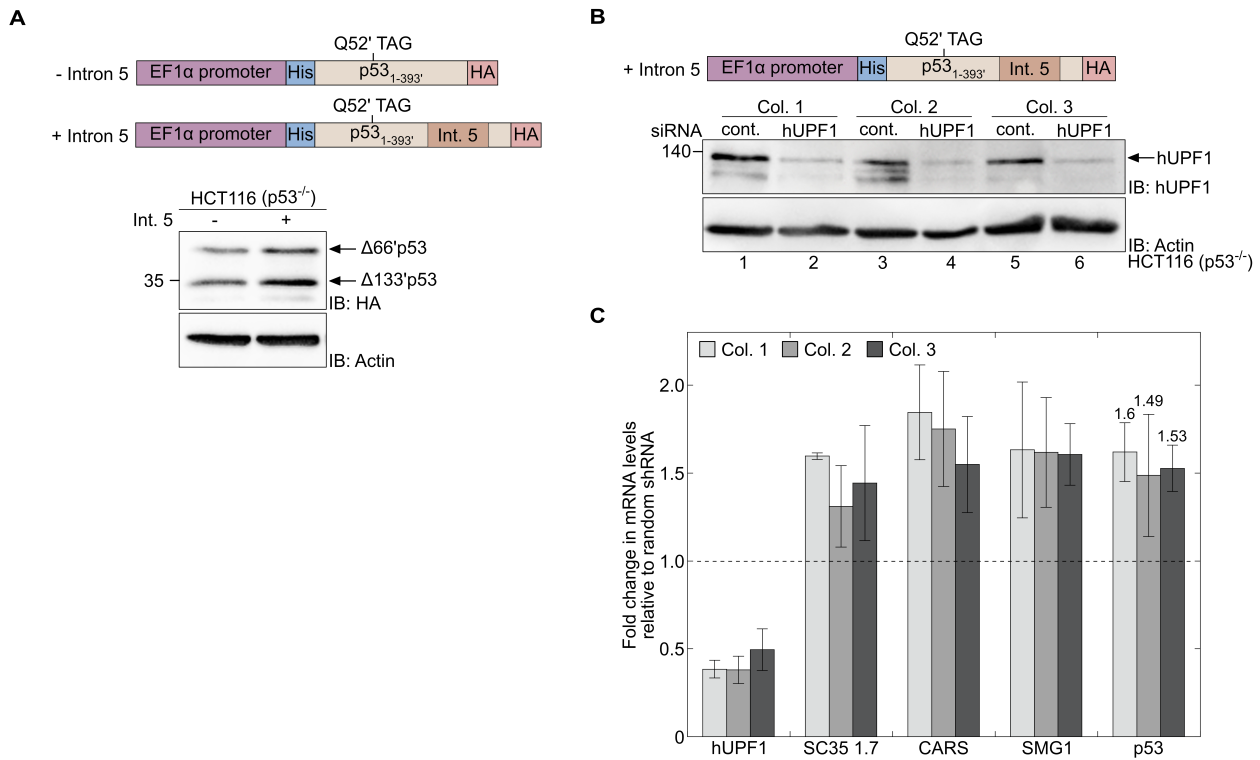

**Figure S9.** (A) The effect of intron 5 and NMD on the expression of  $\Delta 66'$ p53. Expression of N-truncated p53 variants in HCT116 ( $p53^{-/-}$ ) cells transfected with p53 Q52'TAG cDNA (-intron 5) or Q52'TAG minigene (+intron 5), evaluated by Western blot analysis using antibodies against the C-terminal HA tag. (B) Knockdown of hUPF1. Three monoclonal HCT116 ( $p53^{-/-}$ ) cell lines were stably transfected with p53 Q52'TAG minigene, and treated with siRNA directed against hUPF1 or control siRNA (cont.). Protein expression levels were evaluated by immunoblotting using a specific antibody against hUPF1. (C) Levels of SC35 1.7, CARS, SMG1 and p53 mRNA transcripts in cells stably expressing Q52'TAG minigene, as described in panel B. Data represent the fold change in mRNA levels, following treatment with hUPF1-specific siRNA, relative to cells treated with control siRNA. Values are the mean  $\pm$  SD of three independent experiments, each measured in triplicates.
